# Supplementary material for: A Practical Guide to Relugolix: Early Experience With Oral Androgen Deprivation Therapy
Source: PubMed Central journal article supplement (PMC10400130; doi:10.1093/oncolo/oyad036), 2023-03-08
Supplement: oyad036_suppl_supplementary_table_s1.pdf [file oyad036_suppl_supplementary_table_s1.pdf]

| <b>Compliance Data</b>        |              |                 |
|-------------------------------|--------------|-----------------|
| <b>Reporting Missing Dose</b> | N            | %               |
| Yes                           | 66           | 93%             |
| No                            | 5            | 7%              |
| <b>PSA</b>                    | N            | %               |
| Available                     | 71           | 100%            |
| Stable/Decreased              | 69           | 97%             |
| Increase                      | 2            | 3%              |
| <b>Testosterone</b>           | N            | %               |
| Available                     | 61           | 86%             |
| Stable/Improved Castration    | 61           | 100%            |
| Loss of Castration            | 0            | 0%              |
| <b>Pharmacy Data</b>          |              |                 |
| Available                     | N = 45       | 63%             |
| Proportion of Days Covered    | 94%          |                 |
| Number of Prescription Fills  | Median:<br>4 | Range: 1-<br>14 |
