# Supplementary material for: A Practical Guide to Relugolix: Early Experience With Oral Androgen Deprivation Therapy
Source: PubMed Central journal article supplement (PMC10400130; doi:10.1093/oncolo/oyad036), 2023-03-08
Supplement: oyad036_suppl_supplementary_table_s2.pdf [file oyad036_suppl_supplementary_table_s2.pdf]

| <b>Patients Who Did Not Fill Relugolix Prescription</b> |          |          |
|---------------------------------------------------------|----------|----------|
| <b><i>Race</i></b>                                      | <b>N</b> | <b>%</b> |
| White – Non-Hispanic                                    | 9        | 64%      |
| Hispanic/Latino                                         | 1        | 7%       |
| Black                                                   | 0        | 0%       |
| Asian                                                   | 4        | 29%      |
| American Indian/Native                                  | 0        | 0%       |
| Not Reported                                            | 0        | 0%       |
| <b><i>Insurance</i></b>                                 | <b>N</b> | <b>%</b> |
| Medicare                                                | 11       | 79%      |
| Private                                                 | 3        | 21%      |
| Medi-Cal                                                | 0        | 0%       |
| Other                                                   | 0        | 0%       |
