# Supplementary material for: A Practical Guide to Relugolix: Early Experience With Oral Androgen Deprivation Therapy
Source: PubMed Central journal article supplement (PMC10400130; doi:10.1093/oncolo/oyad036), 2023-03-08
Supplement: oyad036_suppl_supplementary_table_s3.pdf [file oyad036_suppl_supplementary_table_s3.pdf]

**Available PSA and Testosterone Levels by 3 Months in Patients Who Switched to Relugolix**

| <b>PSA</b>                 | <b>N</b> | <b>%</b> |
|----------------------------|----------|----------|
| Available                  | 15       | 79%      |
| Stable/Decreased           | 15       | 100%     |
| Increased                  | 0        | 0%       |
| <b>Testosterone</b>        | <b>N</b> | <b>%</b> |
| Available                  | 9        | 47%      |
| Castration Stable/Achieved | 100      | 100%     |
| Loss of Castration         | 0        | 0%       |
